# Supplementary material for: ClusterMap: multi-scale clustering analysis of spatial gene expression
Source: Research Square preprint supplement (doi:10.21203/rs.3.rs-249361/v1), 2021-02-25
Supplement: Supplementary file 1 [file 83c217e5248ad811f8a29c48.pdf]

- 1 **Supplementary information for ‘ClusterMap: multi-scale clustering analysis of spatial gene**
- 2 **expression’**

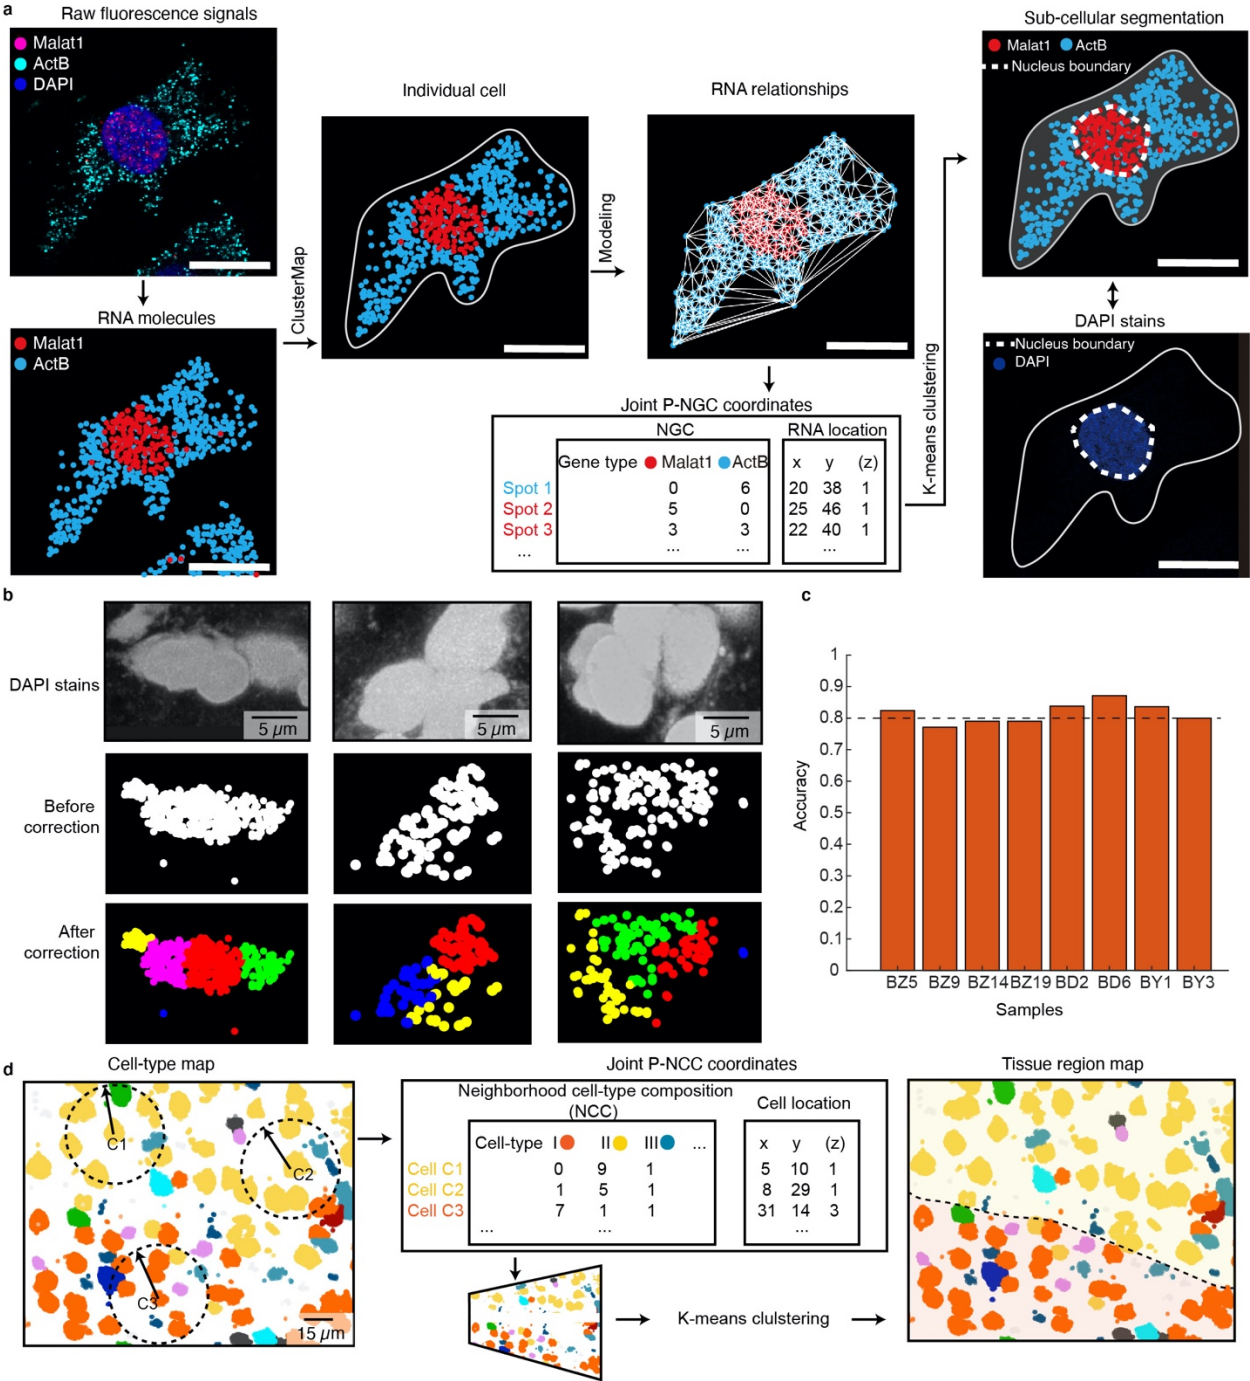

## Supplementary Figure 1

Sub-cellular analysis, validation of the cell identification method, and tissue region analysis.

**a**, Subcellular analysis process the fourth panel IV in **Fig. 1d** by ClusterMap. A three-channel (magenta: *Malat1*; cyan: *ActB*; blue: DAPI) composite image shows raw fluorescent signals.

After preprocessing mRNA molecules with specific genes are located, ClusterMap first performs cellular resolution and identifies individual cells. Then a mesh graph that models the relationships among mRNA spots in the cell is generated to compute the NGC coordinates and K-means clustering separate spots into two regions using joint physical and NGC coordinates. Finally a convex hull is constructed from the nucleus spots, denoting the nucleus boundary. The pattern of ClusterMap-constructed nucleus boundary is compared with the DAPI stains. Scale bar: 20 $\mu$ m.

**b**, Examples of the cell identification correction using information from NGC space during ClusterMap procedures in **Fig. 2a**. Upper: DAPI stains showing the cell nuclei. Middle: Cell clustering results using only information in the physical space. Closely overlapping cells are not separated. Lower: With information from NGC space, the under-clustered cells are separated.

**c**, The accuracy of cell identification results from eight STARmap datasets compared with corresponding expert-annotated labels. BZ5, BZ9, BZ14, BZ19: four STARmap 166-gene sets in mouse medial prefrontal cortex (mPFC); BD2, BD6: two STARmap 160-gene sets in mouse V1. BY1, BY3: two STARmap 1020-gene sets in mouse V1. The horizontal line is at 80% accuracy.

**d**, ClusterMap constructs the tissue regions after cell-typing. First, the neighborhood cell-type composition (NCC) of each cell is computed by considering a sliding window over the cell-type map. Then both the NCC and physical locations of cells are combined for K-means clustering.

26 Cells with highly correlated neighboring cell-type composition and close spatial distances are  
27 merged into a single tissue region signature.



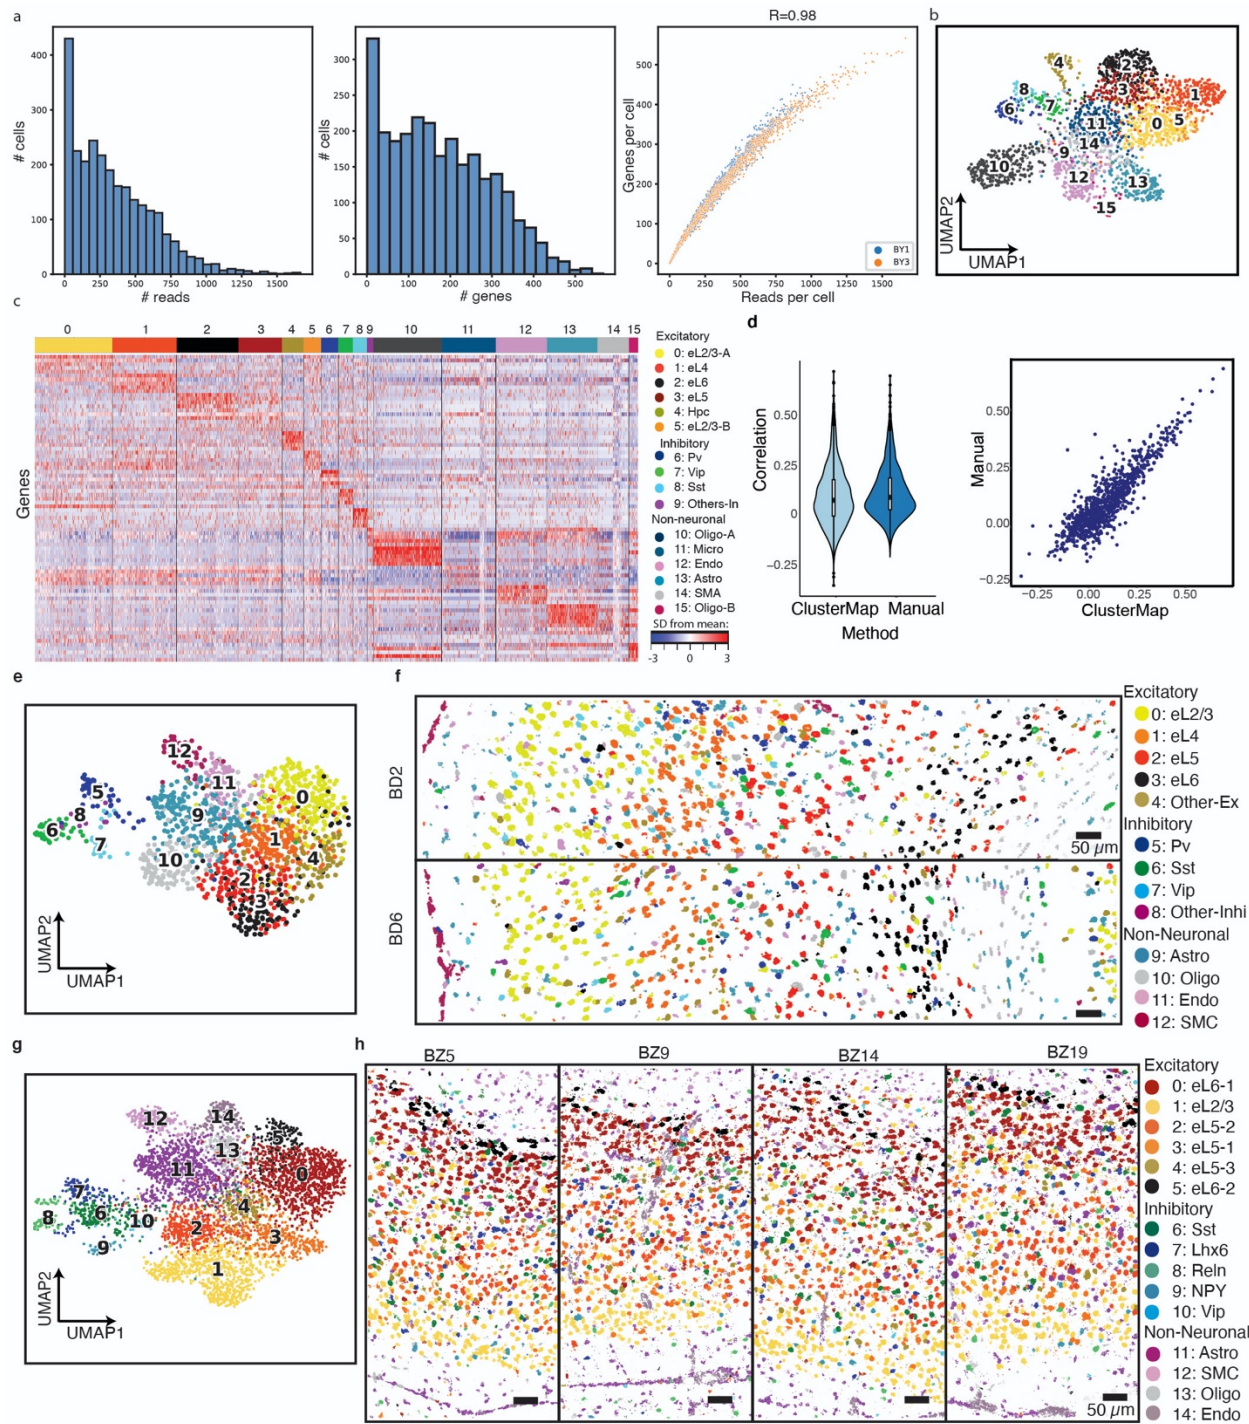

29 **Supplementary Figure 2**

30 Identification of cell types in mouse V1 datasets.

31 **a**, Statistics of ClusterMap-identified cells in STARmap mouse V1 1020-gene (two replicates:  
32 BY1 and BY3). Left: Histogram of detected reads (DNA amplicons) per cell. Middle: Histogram  
33 of genes per cell. Right: Correlation plot between genes per cell and reads per cell.

34 **b, c**, UMAP and heatmap visualization of all excitatory, inhibitory and non-neuronal cell types in  
35 BY1 and BY3.

36 **d**, Correlation plots after integration with scRNA-seq atlas. Left: Violin plots of Pearson  
37 correlation between gene expression in scRNA-seq atlas and ClusterMap or manual. Right:  
38 Correlation plot between integration results of ClusterMap manual annotation.

39 **e, g**, UMAP visualization of all excitatory, inhibitory and non-neuronal cell types in STARmap  
40 160-gene datasets in mouse V1 (two replicates: BD2, BD6, **(e)**), and STARmap 166-gene  
41 datasets in mPFC (four replicates, BZ5, BZ9, BZ14, BZ19, **(h)**).

42 **f, h**, Spatial organization map of cell types in BD2 and BD6 **(e)**, and in BZ5, BZ9, BZ14 and  
43 BZ19 **(h)**.

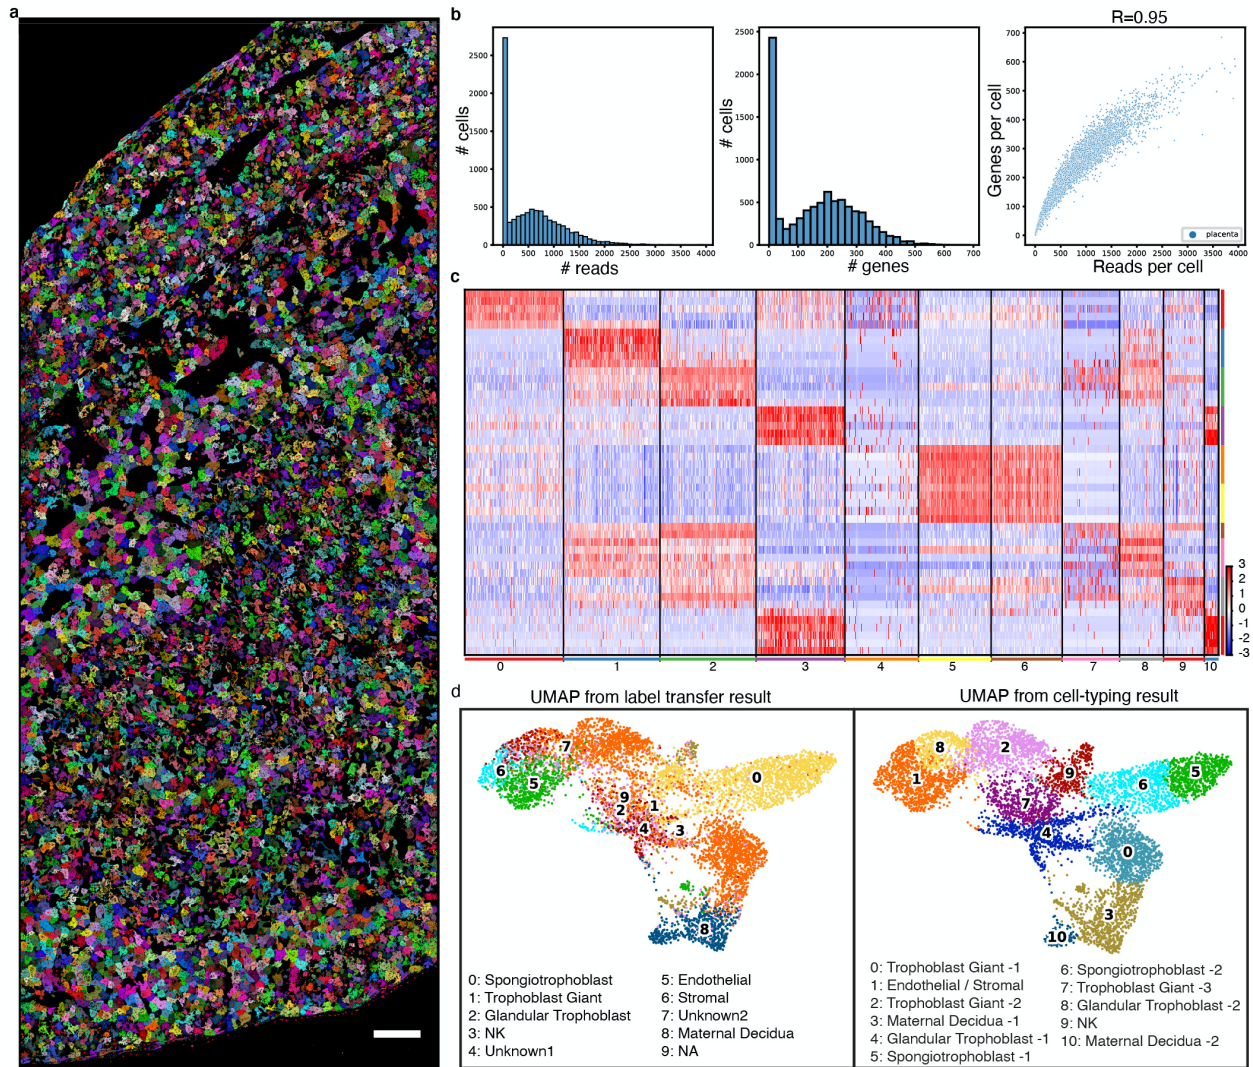

45 **Supplementary Figure 3**

46 Analyses of the placental dataset.

47 **a**, ClusterMap generates the cell map of the STARmap mouse placenta 903-gene dataset,  
48 including 7,224 cells. Scale bar: 100  $\mu$ m.

49 **b**, Statistics of ClusterMap identified placental cells as shown in (**a**). Left: Histogram of detected  
50 reads (DNA amplicons) per cell. Middle: Histogram of genes per cell. Right: Correlation plot  
51 between genes per cell and reads per cell.

52 **c**, Heatmap visualization of 11 cell types. Names are in the right panel of (**d**).

53 **d**, UMAP from label transfer results with scRNA-seq, compared with UMAP of the Louvain  
54 clustering in ClusterMap.



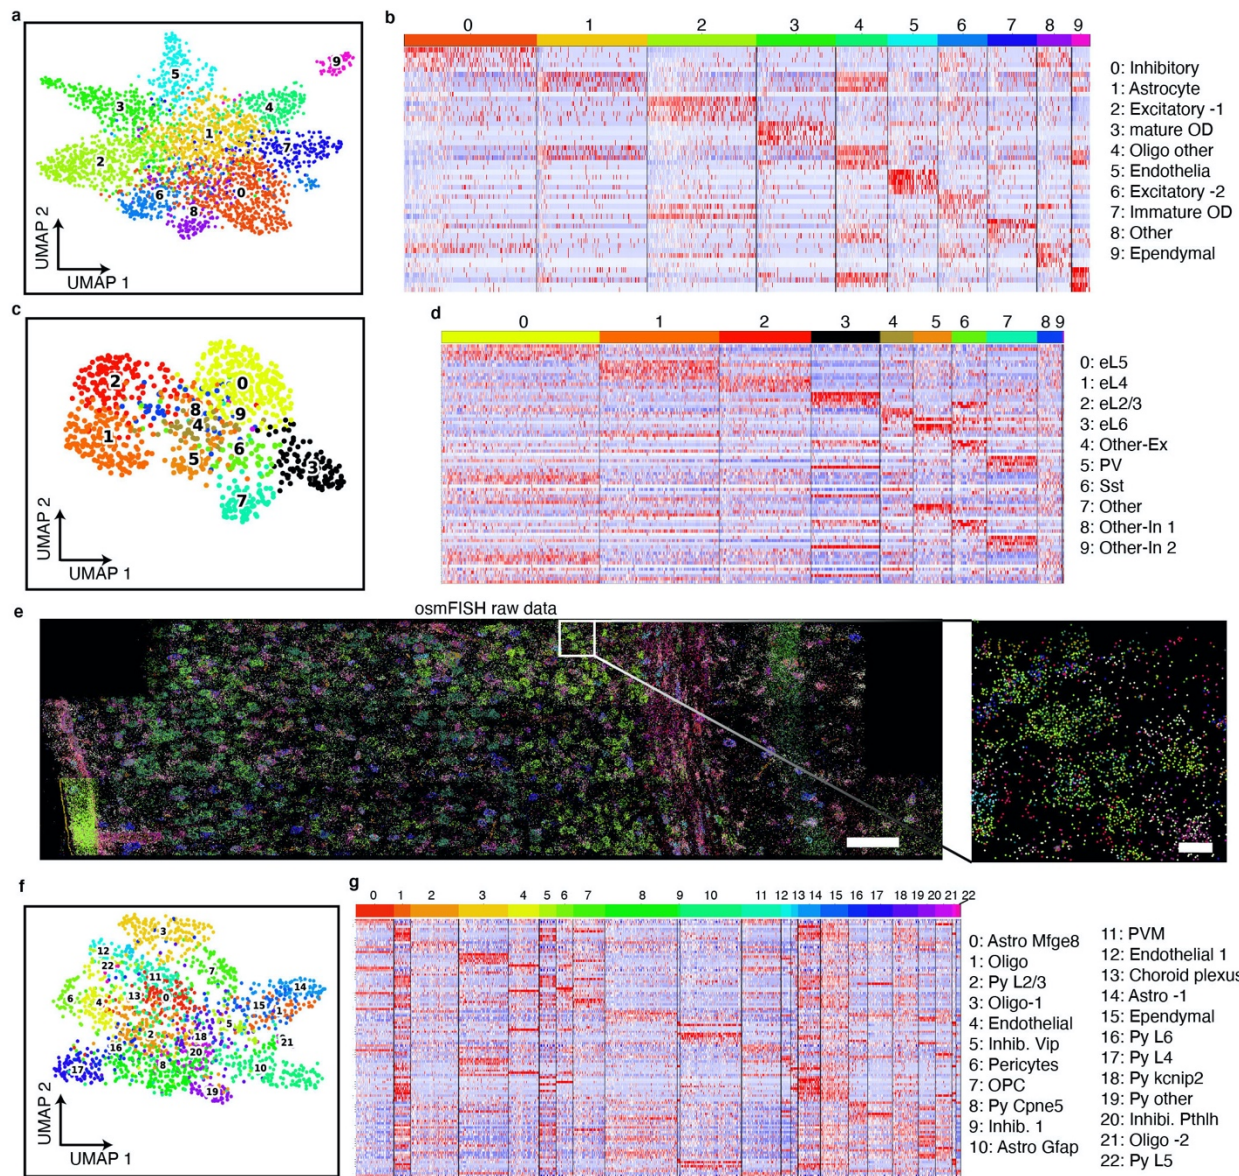

56 **Supplementary Figure 4**

57 Analyses of datasets generated across various protocols.

58 **a, b**, UMAP and heatmap visualization of ten cell types in the selected area from the MERFISH  
59 mouse POA dataset.

60 **c, d**, UMAP and heatmap visualization of ten cell types in the selected area from the pciSeq  
61 mouse isocortex dataset.

62 **e**, Raw spatial transcriptomics data of the selected area from the osmFISH mouse SSp dataset.

63 Scale bar: 100µm. Left: zoomed in view of the highlighted square. Scale bar: 10 µm.

64 **f, g**, UMAP and heatmap visualization of seven main types and 22 subtypes of (**e**).

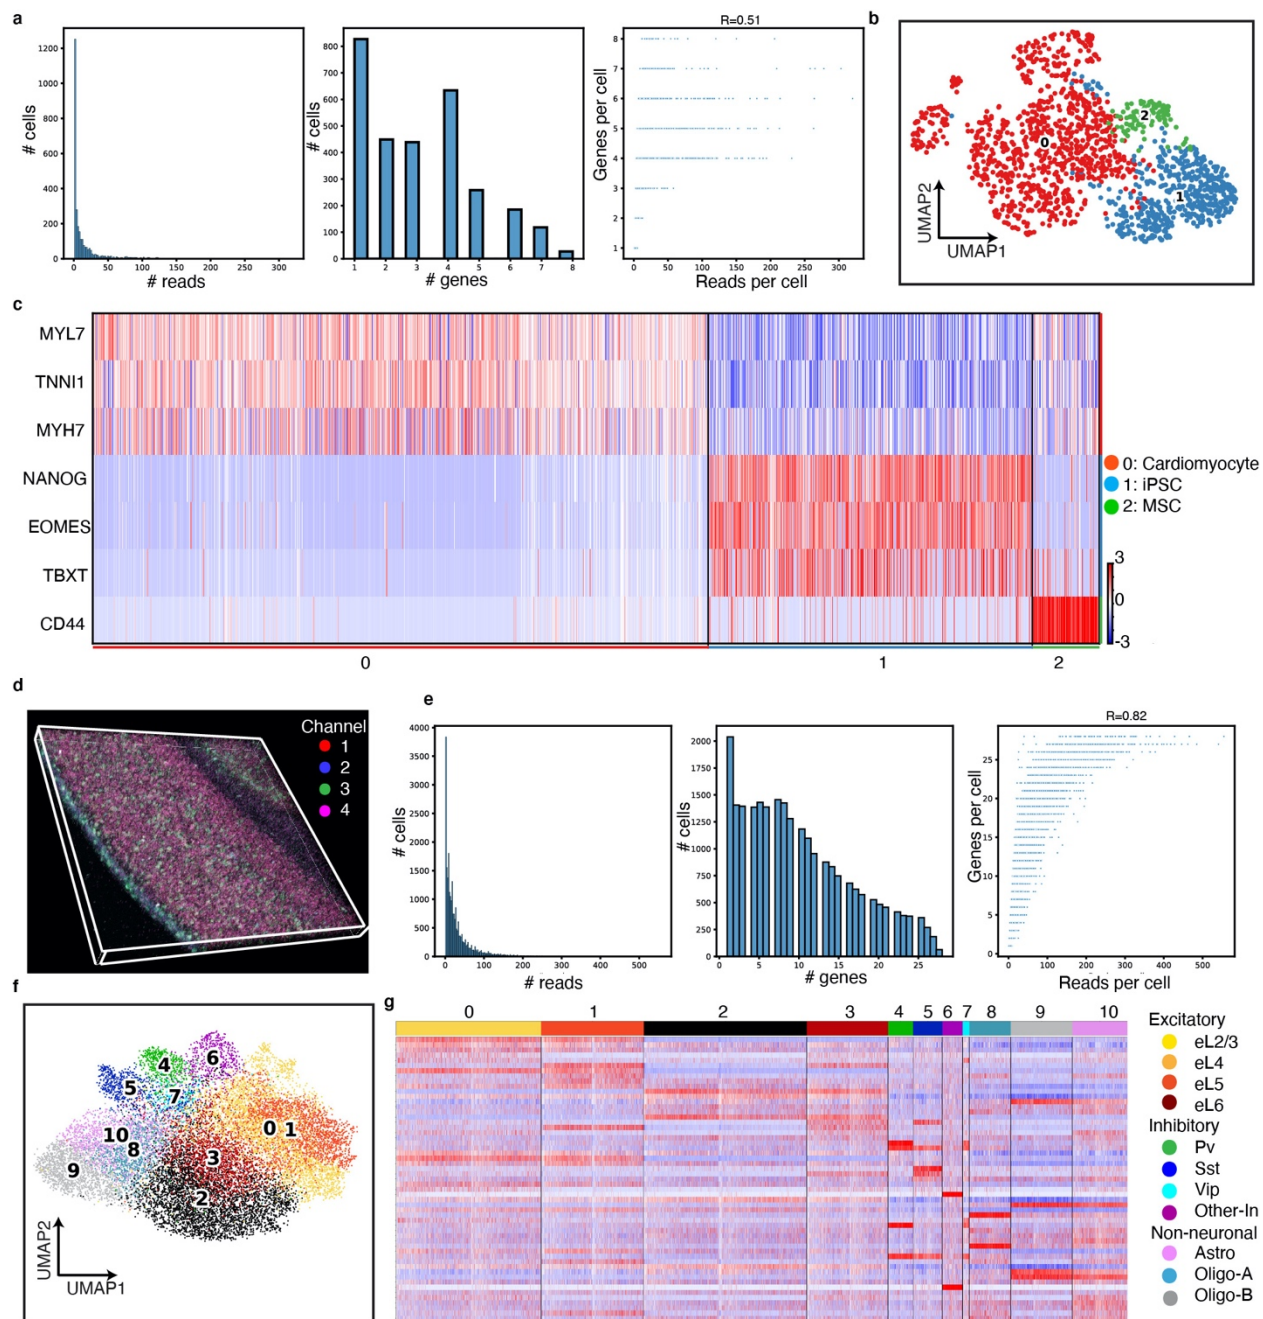

66 **Supplementary Figure 5**

67 Analyses in the 3D datasets.

68 **a**, Statistics of ClusterMap identified cells in the 3D STARmap cardiac organoid 8-gene dataset.

69 Left: Histogram of detected reads (DNA amplicons) per cell. Middle: Histogram of genes per  
70 cell. Right: Correlation plot between genes per cell and reads per cell.

71 **b, c**, UMAP and heatmap visualization of three cell types in the STARmap cardiac organoid 8-  
72 gene dataset. The number of cells in each cell type is as follows: cardiomyocytes, 929; induced  
73 pluripotent stem cells (iPSCs), 489; mesenchymal stem cells (MSCs), 101.

74 **d**, 3D four-channel composite raw fluorescent image of the first sequencing round shows spatial  
75 arrangement of mRNA molecules in the STARmap mouse V1 28-gene dataset. Width 184  $\mu\text{m}$ ,  
76 height 194  $\mu\text{m}$ , depth 100  $\mu\text{m}$ .

77 **e**, Statistics of ClusterMap identified cells in **(d)**. Left: Histogram of detected reads (DNA  
78 amplicons) per cell. Middle: Histogram of genes per cell. Right: Correlation plot between genes  
79 per cell and reads per cell.

80 **f, g**, UMAP and heatmap visualization of three cell types of **(d)**.



81 **Supplementary Tables**

82 **Supplementary Table 1**

| <b>Dataset</b>                  | <b>Method</b> | <b>Tissue</b>                            | <b># Gene</b> | <b># Cell</b> | <b># Cell type</b> | <b>Figure</b>                         | <b>Notes</b>                 |
|---------------------------------|---------------|------------------------------------------|---------------|---------------|--------------------|---------------------------------------|------------------------------|
| STARmap mouse V1 1020-gene      | STARmap       | Mouse brain primary visual cortex        | 1,020         | 1,447         | 16                 | Fig. 1c, Fig. 2, Supplementary Fig. 2 | Source: Ref. 6. 2D analysis. |
| STARmap mouse placenta 903-gene | STARmap       | Mouse brain primary visual cortex        | 903           | 7224          | 11                 | Fig. 3, Fig. 4, Supplementary Fig. 3  | New data. 2D analysis.       |
| MERFISH H mouse POA             | MERFISH       | Mouse brain hypothalamic preoptic region | 140           | 3,113         | 10                 | Fig.5, Supplementary Fig. 4           | Source: Ref. 3. 2D analysis. |
| pciSeq mouse isocortex          | pciSeq        | Mouse brain isocortex region             | 98            | 982           | 8                  | Fig.5, Supplementary Fig. 4           | Source: Ref. 4. 2D analysis. |
| osmFISH mouse SSp               | osmFISH       | Mouse brain somatosensory cortex         | 33            | 1,962         | 19                 | Fig.5, Supplementary Fig. 4           | Source: Ref. 5. 2D analysis. |
| STARmap cardiac organoid 8-gene | STARmap       | Cardiac organoid                         | 8             | 1,519         | 3                  | Fig. 6, Supplementary Fig. 5          | New data, 3D analysis.       |
| STARmap mouse V1 28-gene        | STARmap       | Mouse brain primary visual cortex        | 28            | 24,590        | 11                 | Fig. 6, Supplementary Fig. 5          | Source: Ref. 6. 3D analysis. |

83 Summary of the name, *in situ* sequencing protocol, tissue, number of genes, number of cells,

84 number of cell types, corresponding figures and note of 7 datasets.
